# Supplementary material
Source: PubMed Central journal article supplement (PMC5953380)
Supplement: tpmd170809.SD1.pdf [file tpmd170809.SD1.pdf]

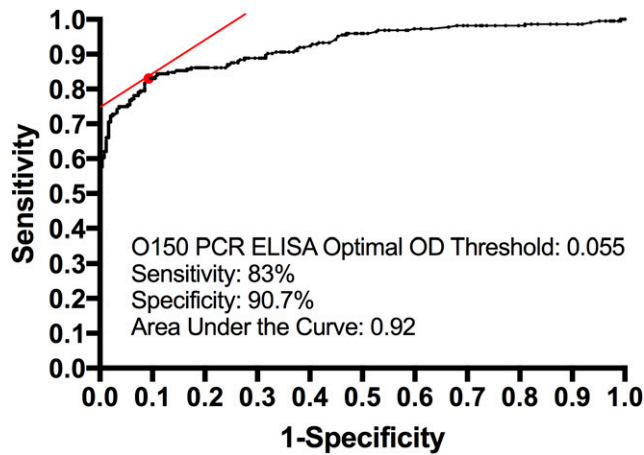

SUPPLEMENTAL FIGURE 1. Receiver operator characteristics analysis of O150-PCR ELISA OD values using the qPCR-O150 results as the gold standard comparator. The optimal threshold OD = 0.055 point on the curve is shown with a large red point along with the sensitivity and specificity of this threshold.

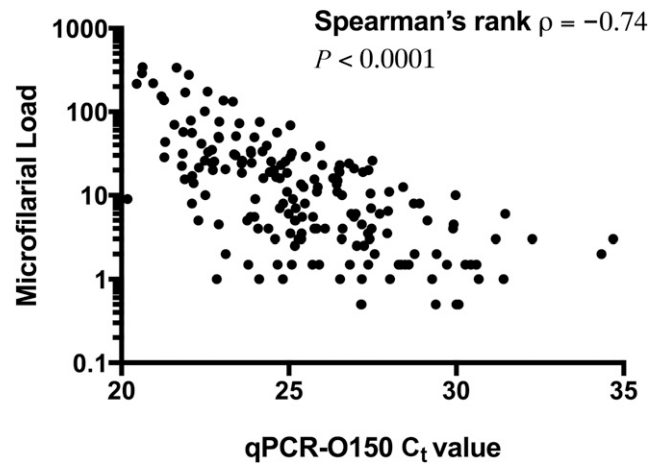

SUPPLEMENTAL FIGURE 2. Microfilarial loads are inversely correlated with qPCR-O150 quantification as measured by the observed cycle threshold ( $C_t$ ) value (Spearman's rank correlation =  $-0.74$ ,  $P < 0.0001$ ). The x axis depicts the average  $C_t$  value from experimental replicates of DNA from skin snips, whereas the y axis depicts the microfilarial count derived from microscopic evaluation of skin snips.

SUPPLEMENTAL TABLE 1  
Summary of PCR assays for filarial DNA detection used in this study

| PCR                                           | Filarial species           | Type of PCR                                 | Target sequence | Primer sequences                                                                                      | Probe sequences                                                             |
|-----------------------------------------------|----------------------------|---------------------------------------------|-----------------|-------------------------------------------------------------------------------------------------------|-----------------------------------------------------------------------------|
| qPCR-O150 <sup>11</sup>                       | <i>Onchocerca volvulus</i> | Real-time PCR (TaqMan)                      | O150 repeat     | F: 5'-TCGCCGTGTAA<br>TGTGGAA-3'<br>R: 5'-AACTGATGACCTA<br>TGACCCTAATC-3'                              | 5'-6-FAM-GGACCCAAT-ZEN-<br>TCGAATGTATGTACCCGT-<br>Iowa Black FQ quencher-3' |
| qPCR-MCA <sup>12</sup>                        | Pan-filarial               | Real-time PCR (EvaGreen) with MCA           | ITS1-5.8S       | ITS1-UNIF: 5'-GGTGwTATTC<br>GTTGGTGTCTAT-3'<br>5.8S-EXTR: 5'-AGCTAGCTG<br>CGTTCCTCAT-3'               | N/A                                                                         |
| O150-PCR ELISA <sup>15</sup>                  | <i>O. volvulus</i>         | Conventional PCR with ELISA-based detection | O150 repeat     | 1,632: 5'-GATTYTCCGRCG<br>AANARCGC-3'<br>1,633 biotin: 5' biotin-GCNRT<br>RTAAATNTGNAAATTC-3'         | 5'-AATCTCAAAAACGGGT<br>ACATA-6-FAM 3'                                       |
| <i>Mansonella perstans</i> qPCR <sup>31</sup> | <i>M. perstans</i>         | Real-time PCR (TaqMan)                      | ITS1            | MP ITS1 Forward: 5'-AGGATC<br>ATTAACGAGCTTCC-3'<br>MP ITS1 Reverse: 5'-CGAATAT<br>CACCGTTAATTCAGT-3'  | 5'-6-FAM-TTCACTTTTATTT<br>AGCAACATGCA-BHQ1-3'                               |
| <i>Loa loa</i> qPCR <sup>32</sup>             | <i>L. loa</i>              | Real-time PCR (TaqMan)                      | ORF LLMF72      | LLMF72 Forward: 5'-CGGAAGA<br>CTCAACGTCAGAAATCA-3'<br>LLMF72 Reverse: 5'-AGGAACG<br>CTTGATGGTGATGT-3' | 5'-6-FAM-CCAACAGCCTG<br>CTTTT-BHQ1-3'                                       |

MCA = melt curve analysis.
